# Supplementary material for: Development of a gas phase chemiluminescence system for the measurement of arsenic in drinking water
Source: Royal Society of Chemistry journal article supplement (doi:10.1039/c1ay05476g), 2011-01-01
Supplement: c1ay05476g.pdf [file c1ay05476g.pdf]

### Supplemental Data

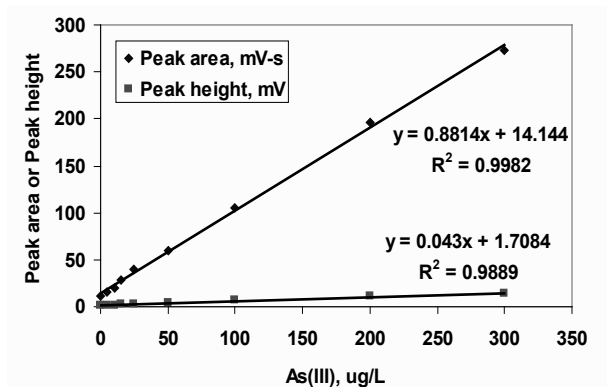

**Figure S-1.** Comparison of peak area and peak height based calibrations without background subtraction.

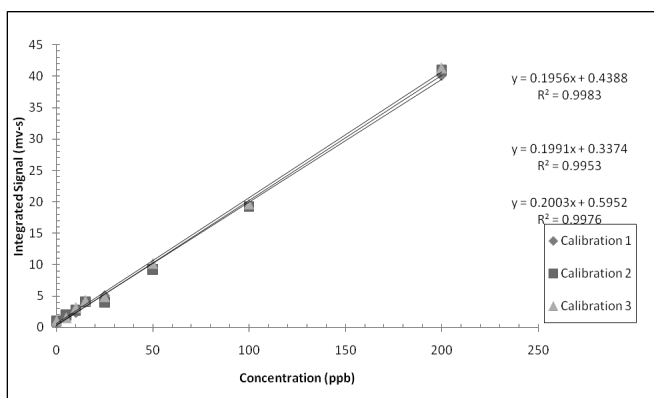

**Figure S-2.** Concentration calibrations in three consecutive days.

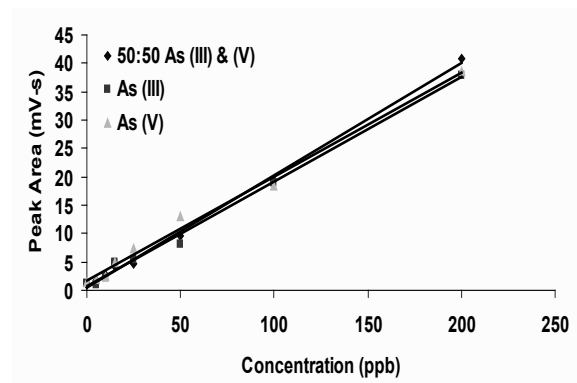

First draft 05/2010 ah rev2/6/25/2011 11:57:22 AM

**Figure S-3.** Concentration calibrations for arsenic species. Calibration parameters are listed in Table 1

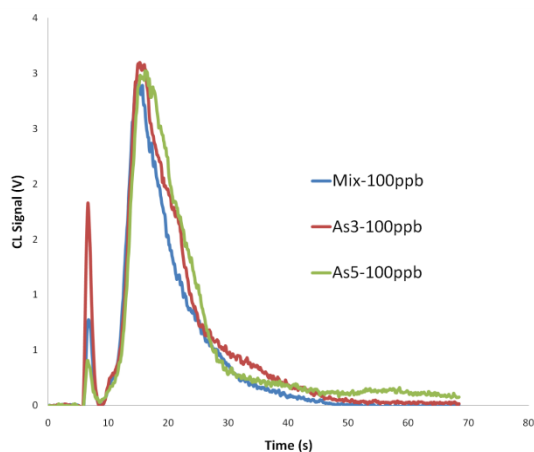

**Figure S-4.** Transient signal reproducibility of As(III), As(V), and the mixture superimposed upon each other

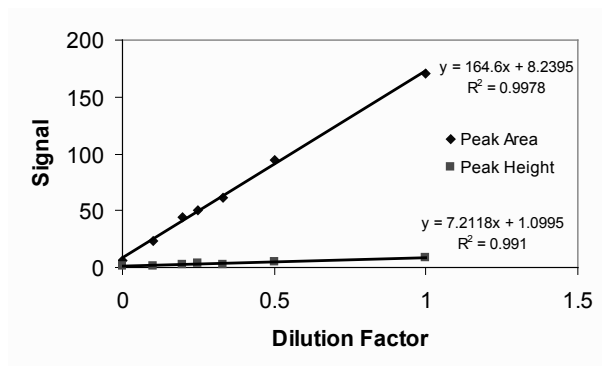

**Figure S-5.** Dilution experiment with a groundwater sample. Peak area shows better linearity compared to peak height. The lowest dilution factor 0.1 corresponds to 26.8  $\mu\text{g/L}$  As(total).

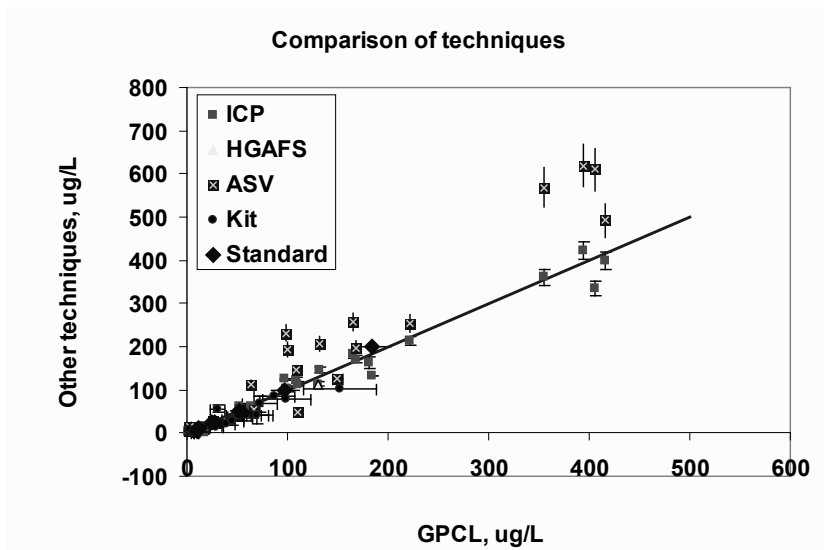

Figure S-6. Linear plot of field sample analysis comparison
